# Supplementary material for: Effects of repeated sprints training on fracture risk-associated miRNA
Source: PubMed Central journal article supplement (PMC5915055; doi:10.18632/oncotarget.24707), 2018-04-06
Supplement: oncotarget-09-18029-s001.pdf [file oncotarget-09-18029-s001.pdf]

## Effects of repeated sprints training on fracture risk-associated miRNA

### SUPPLEMENTARY MATERIALS

Supplementary Table 1: miRNA identification for primers search

| miRNA ID        | miRBase Accession number | miRBase Mature Sequence Accession Number | Sequence                 | Exiqon code |
|-----------------|--------------------------|------------------------------------------|--------------------------|-------------|
| hsa-miR-21-5p   | MI0000077                | MIMAT0000076                             | UAGCUUAUCAGACUGAUGUUGA   | EX204230    |
| hsa-miR-23a-3p  | MI0000079                | MIMAT0000078                             | AUCACAUUGCCAGGGAUUUC     | EX204772    |
| hsa-miR-24-3p   | MI0000080                | MIMAT0000080                             | UGGCUCAGUUCAGCAGGAACAG   | EX204260    |
| hsa-miR-93-5p   | MI0000095                | MIMAT0000093                             | CAAAGUGCUGUUCGUGCAGGUAG  | EX204715    |
| hsa-miR-100-5p  | MI0000102                | MIMAT0000098                             | AACCCGUAGAUCCGAACUUGUG   | EX205689    |
| hsa-miR-122-5p  | MI0000442                | MIMAT0000421                             | UGGAGUGUGACAAUGGUGUUUG   | EX205664    |
| hsa-miR-124-3p  | MI0000443                | MIMAT0000422                             | UAAGGCACGCGGUGAAUGCC     | EX206026    |
| hsa-miR-125b-5p | MI0000446                | MIMAT0000423                             | UCCCUGAGACCCUAAACUUGUGA  | EX205713    |
| hsa-miR-148a-3p | MI0000253                | MIMAT0000243                             | UCAGUGCACUACAGAACUUUGU   | EX205867    |
| hsa-mir-637     | MI0003652                | MIMAT0003307                             | ACUGGGGGCUUUCGGGCUCUGCGU | EX205679    |
| hsa-miR-425-5p  | MI0001448                | MIMAT0003393                             | AAUGACACGAUCACUCCCGUUGA  | EX204337    |
| hsa-mir-484     | MI0002468                | MIMAT0002174                             | UCAGGCUCAGUCCCCUCCCGAU   | EX205636    |
| hsa-miR-451a    | MI0001729                | MIMAT0001631                             | AAACCGUUACCAUUACUGAGUU   | EX204734    |

miRNA primers set were purchased from exiqon as describe in materials and methods.
